# Supplementary material for: Association Between Serum Long-Chain n-3 and n-6 Polyunsaturated Fatty Acid Profiles and Glomerular Filtration Rate Assessed by Serum Creatinine and Cystatin C Levels in Japanese Community-Dwellers
Source: PubMed Central journal article supplement (PMC4375285; doi:10.2188/jea.je20140093), 2015-04-05
Supplement: je-25-303-s001.pdf [file je-25-303-s001.pdf]

**eTable 1. Characteristics of study participants according to serum (EPA+DHA):AA tertile in men in the Sasayama study, 2012-2013**

|                                                  | Tertile of (EPA+DHA):AA         |                                 |                                 |
|--------------------------------------------------|---------------------------------|---------------------------------|---------------------------------|
|                                                  | T <sub>1</sub><br>(0.409-0.904) | T <sub>2</sub><br>(0.908-1.318) | T <sub>3</sub><br>(1.323-3.188) |
| Number of participants                           | 78                              | 80                              | 79                              |
| Age, years                                       | 53 (7)                          | 57 (7)                          | 58 (6)                          |
| BMI, kg/m <sup>2</sup>                           | 23.3 (3.1)                      | 23.5 (2.9)                      | 23.7 (3.2)                      |
| Systolic blood pressure, mm Hg                   | 124 (16)                        | 129 (16)                        | 131 (19)                        |
| Diastolic blood pressure, mm Hg                  | 77 (11)                         | 80 (10)                         | 80 (11)                         |
| Hypertension, %                                  | 29.5                            | 38.8                            | 43.0                            |
| Glucose, mg/dL                                   | 100                             | 101                             | 100                             |
| Diabetes, %                                      | 11.5                            | 12.5                            | 16.5                            |
| Total cholesterol, mg/dL                         | 204 (35)                        | 215 (32)                        | 205 (33)                        |
| LDL cholesterol, mg/dL                           | 124 (31)                        | 125 (30)                        | 122 (32)                        |
| HDL cholesterol, mg/dL                           | 57 (13)                         | 62 (17)                         | 57 (14)                         |
| Medication for dyslipidemia, %                   | 17.9                            | 6.3                             | 5.1                             |
| Current smoking, %                               | 43.6                            | 25.0                            | 29.1                            |
| Current drinking, %                              | 67.9                            | 86.3                            | 75.9                            |
| History of CVD, %                                | 3.8                             | 6.3                             | 6.3                             |
| High-sensitivity C-reactive protein, mg/L        | 0.5                             | 0.4                             | 0.4                             |
| Serum n-3 PUFA, <sup>a</sup> µg/mL               | 201.9 (48.1)                    | 284.5 (69.6)                    | 375.7 (85.0)                    |
| Serum n-6 PUFA, <sup>b</sup> µg/mL               | 1179.9 (208.9)                  | 1180.2 (232.9)                  | 1077.4 (192.2)                  |
| Serum long chain n-3 PUFA, <sup>c</sup> µg/mL    | 178.7 (44.8)                    | 256.4 (67.3)                    | 347.8 (82.1)                    |
| Fish intake, g/week                              | 97 (5)                          | 234 (3)                         | 340 (2)                         |
| Serum creatinine, mg/dL                          | 0.90 (0.24)                     | 0.88 (0.13)                     | 0.86 (0.16)                     |
| eGFR <sub>cre</sub> , mL/min/1.73 m <sup>2</sup> | 73 (15)                         | 72 (13)                         | 74 (16)                         |
| Serum cystatin C, mg/L                           | 0.94 (0.21)                     | 0.87 (0.12)                     | 0.88 (0.14)                     |
| eGFR <sub>cys</sub> , mL/min/1.73 m <sup>2</sup> | 85 (17)                         | 89 (15)                         | 89 (16)                         |

AA, arachidonic acid; BMI, body mass index; CVD, cerebral and cardiovascular disease; DHA, docosahexaenoic acid; EPA, eicosapentaenoic acid; HDL, high-density lipoprotein; LDL, low-density lipoprotein; PUFA, polyunsaturated fatty acid.

Values are means (standard deviations) unless specified otherwise. Glucose and high-sensitivity C-reactive protein levels are presented as medians. Fish intake is presented as geometric mean (SD).

<sup>a</sup> N-3 PUFA: the sum of linolenic acid, EPA, DHA, and docosapentaenoic acid.

<sup>b</sup> N-6 PUFA: the sum of linoleic acid,  $\gamma$ -linolenic acid, dihomo- $\gamma$ -linolenic acid, and AA.

<sup>c</sup> Long-chain n-3 PUFA: the sum of EPA, DHA, and docosapentaenoic acid.
