# Supplementary material for: Association Between Serum Long-Chain n-3 and n-6 Polyunsaturated Fatty Acid Profiles and Glomerular Filtration Rate Assessed by Serum Creatinine and Cystatin C Levels in Japanese Community-Dwellers
Source: PubMed Central journal article supplement (PMC4375285; doi:10.2188/jea.je20140093), 2015-04-05
Supplement: je-25-303-s002.pdf [file je-25-303-s002.pdf]

**eTable 2. Characteristics of study participants according to serum (EPA+DHA):AA tertile in women in the Sasayama study, 2012-2013**

|                                                  | Tertile of (EPA+DHA):AA         |                                 |                                 |
|--------------------------------------------------|---------------------------------|---------------------------------|---------------------------------|
|                                                  | T <sub>1</sub><br>(0.338-0.925) | T <sub>2</sub><br>(0.929-1.282) | T <sub>3</sub><br>(1.283-2.777) |
| Number of participants                           | 103                             | 104                             | 105                             |
| Age, years                                       | 52 (8)                          | 59 (5)                          | 59 (5)                          |
| BMI, kg/m <sup>2</sup>                           | 22.2 (2.8)                      | 22.6 (3.7)                      | 22.8 (3.7)                      |
| Systolic blood pressure, mm Hg                   | 119 (15)                        | 128 (21)                        | 130 (18)                        |
| Diastolic blood pressure, mm Hg                  | 70 (10)                         | 75 (12)                         | 76 (11)                         |
| Hypertension, %                                  | 13.6                            | 38.5                            | 38.1                            |
| Glucose, mg/dL                                   | 93                              | 98                              | 96                              |
| Diabetes, %                                      | 4.9                             | 4.8                             | 3.8                             |
| Total cholesterol, mg/dL                         | 214 (33)                        | 226 (36)                        | 231 (38)                        |
| LDL cholesterol, mg/dL                           | 129 (32)                        | 139 (34)                        | 142 (34)                        |
| HDL cholesterol, mg/dL                           | 67 (13)                         | 67 (14)                         | 67 (17)                         |
| Medication for dyslipidemia, %                   | 20.4                            | 20.2                            | 21.9                            |
| Current smoking, %                               | 10.7                            | 4.8                             | 3.8                             |
| Current drinking, %                              | 40.8                            | 29.8                            | 35.2                            |
| History of CVD, %                                | 2.9                             | 3.8                             | 1.0                             |
| High-sensitivity C-reactive protein, mg/L        | 0.2                             | 0.4                             | 0.4                             |
| Serum n-3 PUFA, <sup>a</sup> µg/mL               | 201.8 (46.2)                    | 280.5 (53.5)                    | 373.9 (79.8)                    |
| Serum n-6 PUFA, <sup>b</sup> µg/mL               | 1192.5 (168.1)                  | 1189.3 (188.3)                  | 1186.4 (189.6)                  |
| Serum long chain n-3 PUFA, <sup>c</sup> µg/mL    | 179.9 (42.9)                    | 254.2 (51.6)                    | 344.5 (79.2)                    |
| Fish intake, g/week                              | 129 (5)                         | 279 (2)                         | 334 (2)                         |
| Serum creatinine, mg/dL                          | 0.66 (0.09)                     | 0.66 (0.09)                     | 0.66 (0.10)                     |
| eGFR <sub>cre</sub> , mL/min/1.73 m <sup>2</sup> | 75 (12)                         | 72 (12)                         | 72 (12)                         |
| Serum cystatin C, mg/L                           | 0.78 (0.12)                     | 0.81 (0.10)                     | 0.81 (0.12)                     |
| eGFR <sub>cys</sub> , mL/min/1.73 m <sup>2</sup> | 96 (18)                         | 89 (13)                         | 88 (15)                         |

AA, arachidonic acid; BMI, body mass index; CVD, cerebral and cardiovascular disease; DHA, docosahexaenoic acid; EPA, eicosapentaenoic acid; HDL, high-density lipoprotein; LDL, low-density lipoprotein; PUFA, polyunsaturated fatty acid.

Values are means (standard deviations) unless specified otherwise. Glucose and high-sensitivity C-reactive protein levels are presented as medians. Fish intake is presented as geometric mean (SD).

<sup>a</sup> N-3 PUFA: the sum of linolenic acid, EPA, DHA, and docosapentaenoic acid.

<sup>b</sup> N-6 PUFA: the sum of linoleic acid,  $\gamma$ -linolenic acid, dihomo- $\gamma$ -linolenic acid, and AA.

<sup>c</sup> Long-chain n-3 PUFA: the sum of EPA, DHA, and docosapentaenoic acid.
