# Supplementary material for: Association Between Serum Long-Chain n-3 and n-6 Polyunsaturated Fatty Acid Profiles and Glomerular Filtration Rate Assessed by Serum Creatinine and Cystatin C Levels in Japanese Community-Dwellers
Source: PubMed Central journal article supplement (PMC4375285; doi:10.2188/jea.je20140093), 2015-04-05
Supplement: je-25-303-s003.pdf [file je-25-303-s003.pdf]

**eTable 3. Multivariate-adjusted linear regression models<sup>a</sup> between serum n-3 and n-6 PUFA profiles and estimated GFRs by 2 different equations**

| Dependent variables                        | Independent variables    |         |                          |         |
|--------------------------------------------|--------------------------|---------|--------------------------|---------|
|                                            | eGFR <sub>cre</sub>      |         | eGFR <sub>cys</sub>      |         |
|                                            | standardized coefficient | P value | standardized coefficient | P value |
| Serum EPA                                  | 0.010                    | 0.826   | 0.082                    | 0.037   |
| Serum DHA                                  | 0.011                    | 0.817   | 0.091                    | 0.022   |
| Serum EPA+DHA                              | 0.011                    | 0.808   | 0.094                    | 0.018   |
| Serum long-chain n-3 PUFA <sup>b</sup>     | 0.015                    | 0.752   | 0.093                    | 0.020   |
| Serum EPA/AA                               | 0.016                    | 0.719   | 0.078                    | 0.039   |
| Serum DHA/AA                               | 0.037                    | 0.417   | 0.087                    | 0.024   |
| Serum EPA+DHA/AA                           | 0.030                    | 0.510   | 0.090                    | 0.020   |
| Serum long-chain n-3 PUFA <sup>b</sup> :AA | 0.034                    | 0.454   | 0.089                    | 0.021   |

AA, arachidonic acid; DHA, docosahexaenoic acid; EPA, eicosapentaenoic acid; GFR, glomerular filtration rate; PUFA, polyunsaturated fatty acids.

<sup>a</sup> Relationships between each fatty acid profile and eGFR were evaluated separately by linear regression model after adjusting for age, sex, BMI, hypertension, diabetes mellitus, serum HDL- and LDL-cholesterol level, medication for dyslipidemia, and current smoking and drinking.

<sup>b</sup> Long-chain n-3 PUFA: sum of EPA, DHA, and docosapentaenoic acid.
